# Supplementary material for: A label-free fluorescence nanosensor for the determination of adrenaline based on graphene quantum dots
Source: Royal Society of Chemistry journal article supplement (doi:10.1039/c7ay01271c), 2017-01-01
Supplement: c7ay01271c1.pdf [file c7ay01271c1.pdf]

## **Electronic Supplementary Information**

### **A label-free fluorescence nanosensor for the determination of adrenaline based on graphene quantum dots**

Mengke Wang, Yan Li, Lei Wang, Xingguang Su,\*

*Department of Analytical Chemistry, College of Chemistry, Jilin University,  
Changchun 130012, PR China*

\*Corresponding author

Tel.: +86-431-85168352

*E-mail address: [suxg@jlu.edu.cn](mailto:suxg@jlu.edu.cn)*

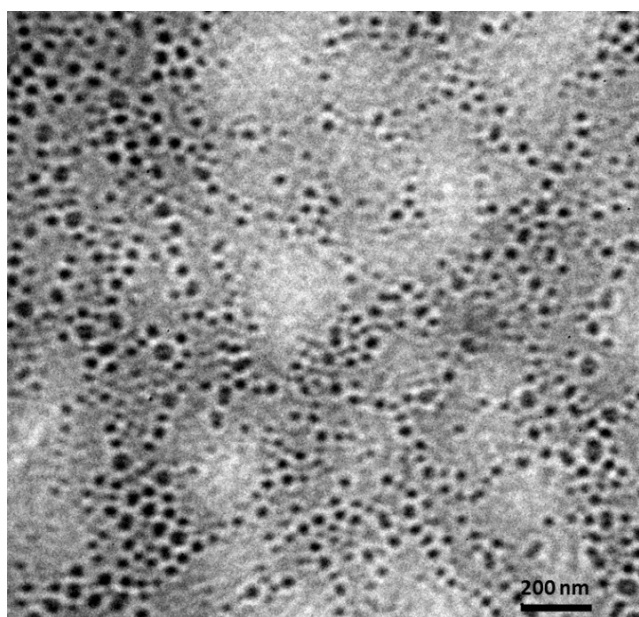

**Fig. S1** The TEM image of the GQDs

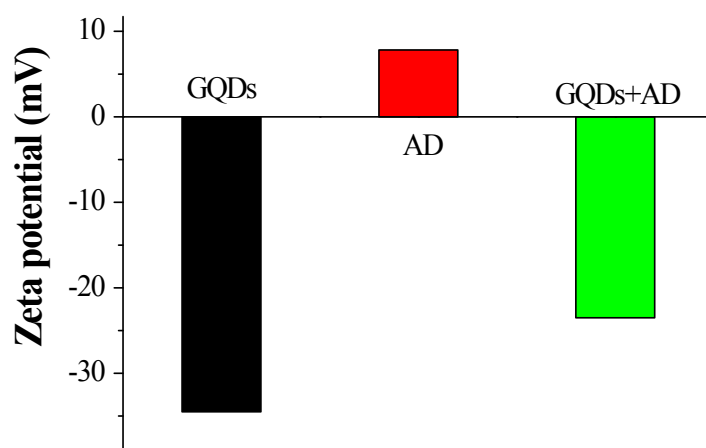

**Fig. S2** The zeta potentials of GQDs, AD and GQDs-AD in the PBS (10 mM, pH 7.0)

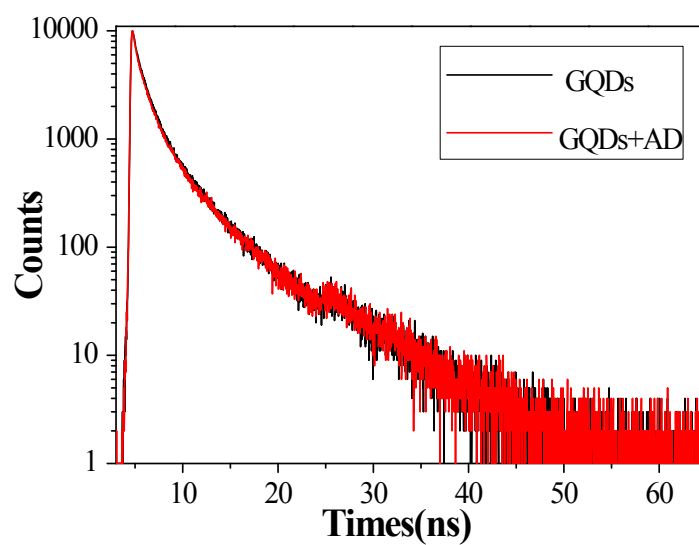

**Fig. S3** The fluorescence lifetime of GQDs and the mixture of GQDs and AD

**Table S1** Data on elemental analysis (C, H, O) of GQDs

| Name    | C (%) | H (%) | O (%) |
|---------|-------|-------|-------|
| Value   | 58.78 | 1.98  | 39.24 |
| RSD [%] | 3.32  | 0.71  | 2.96  |
